# Supplementary material for: Utilization of electron-beam irradiation under atomic-scale chemical mapping for evaluating the cycling performance of lithium transition metal oxide cathodes
Source: Royal Society of Chemistry journal article supplement (doi:10.1039/d0ta10415a), 2020-12-29
Supplement: d0ta10415a1.pdf [file d0ta10415a1.pdf]

Supplementary Information

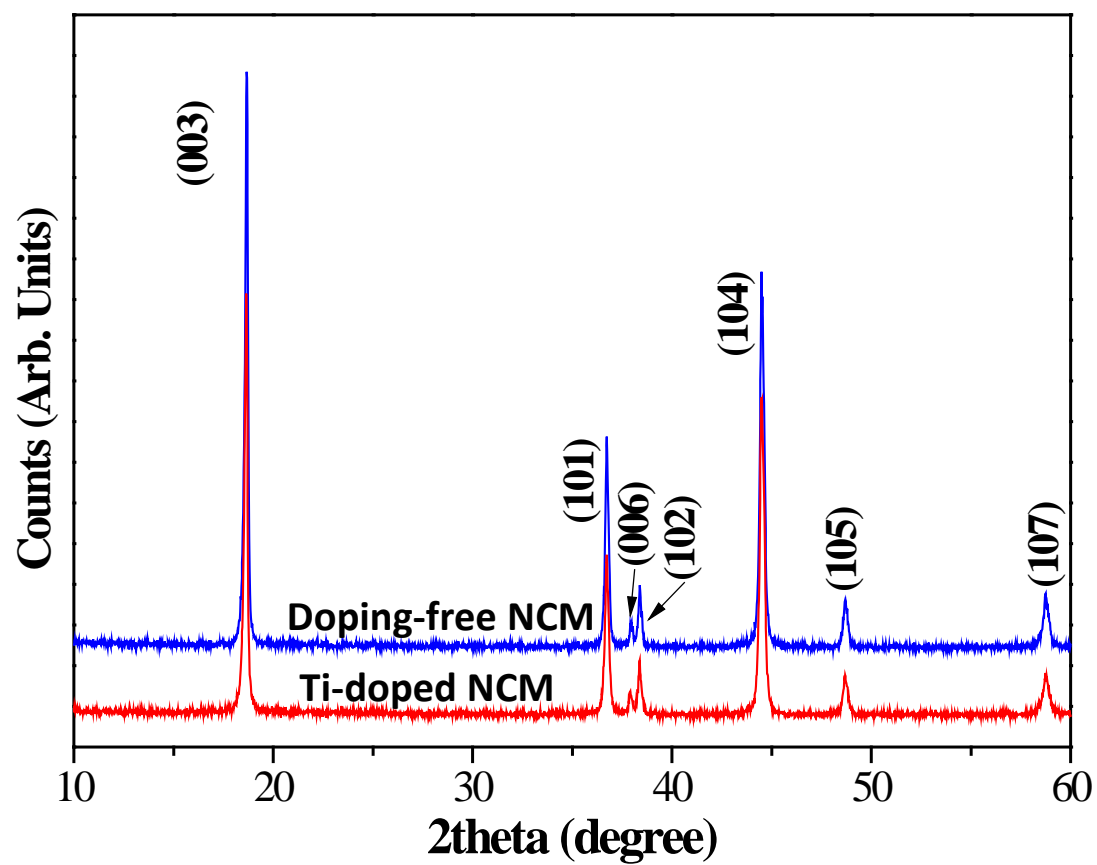

Figure 1S. X-ray diffraction patterns of the pure and Ti-doped NCM.

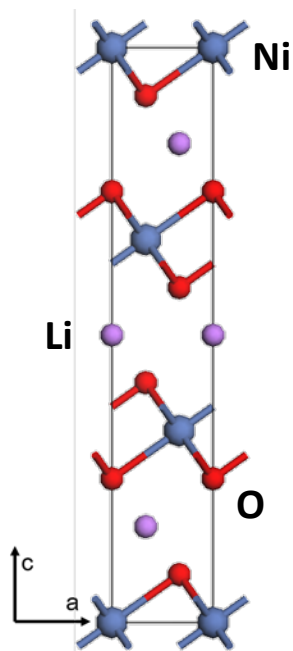

**(a) Unit-cell of  $\text{LiNiO}_2$**

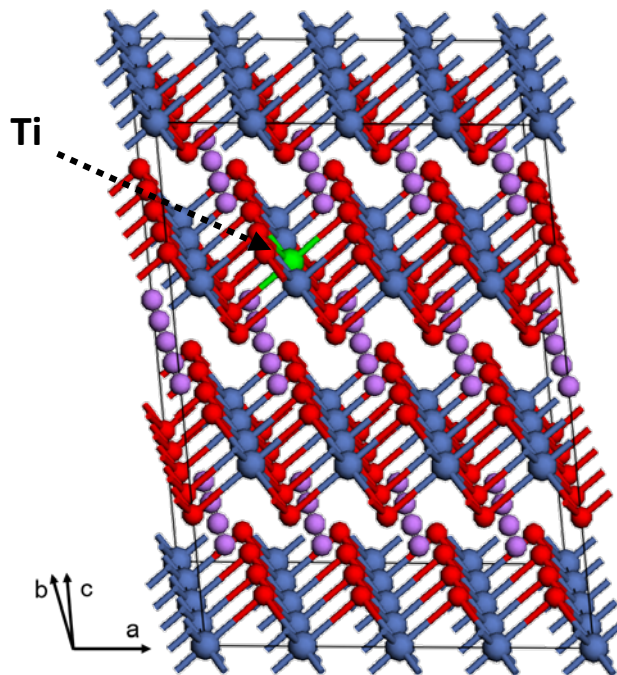

**(b) Ti-doped  $\text{LiNiO}_2$**

Figure 2S. DFT calculated systems for this study. (a) Unit cell of the pure  $\text{LiNiO}_2$  and (b) Ti-doped  $\text{LiNiO}_2$ .

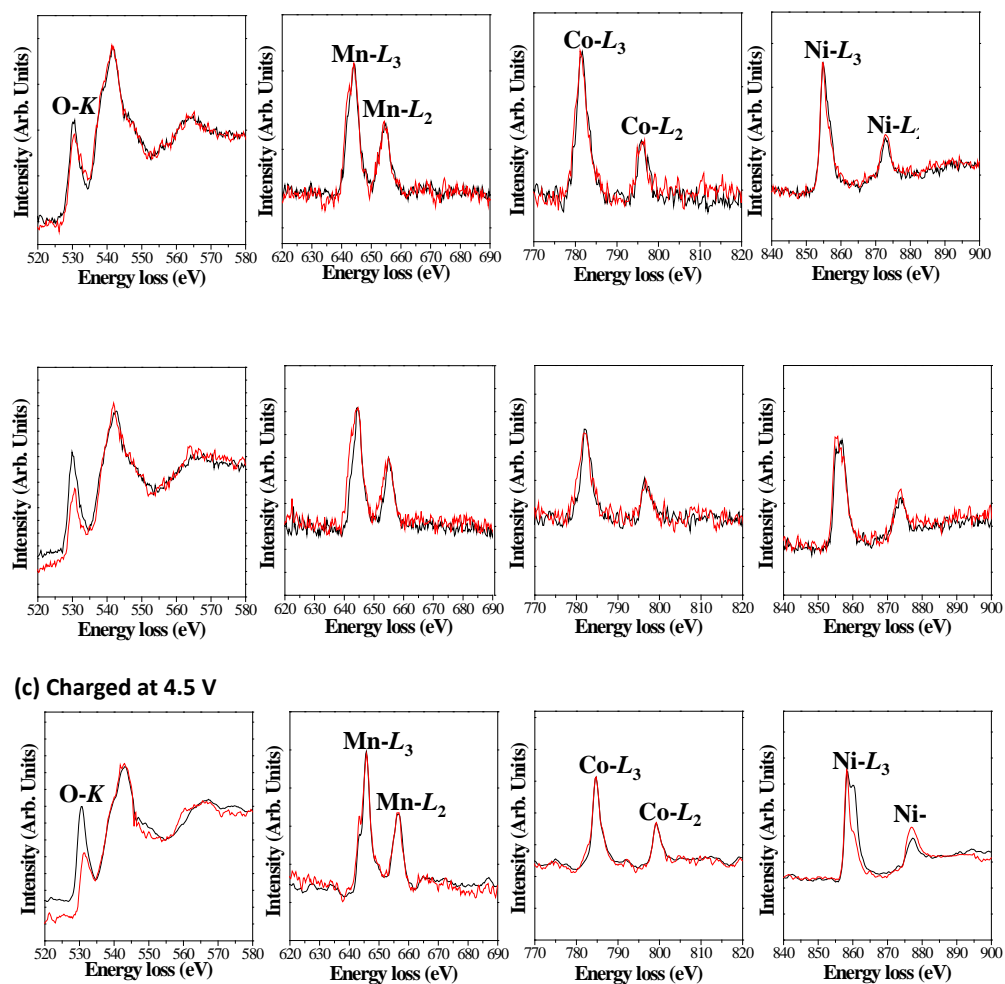

Figure 3S. EELS profiles of O K and TM L edges obtained at an accelerating voltage of 200 kV of the pure  $\text{LiNi}_{0.6}\text{Co}_{0.2}\text{Mn}_{0.2}\text{O}_2$ ; (a) discharged and (b, c) charged states at 4.3 and 4.5 V, respectively. The black and red lines are the spectra obtained at initial (0 s) and final (600 s) stages of the electron beam irradiation, respectively.

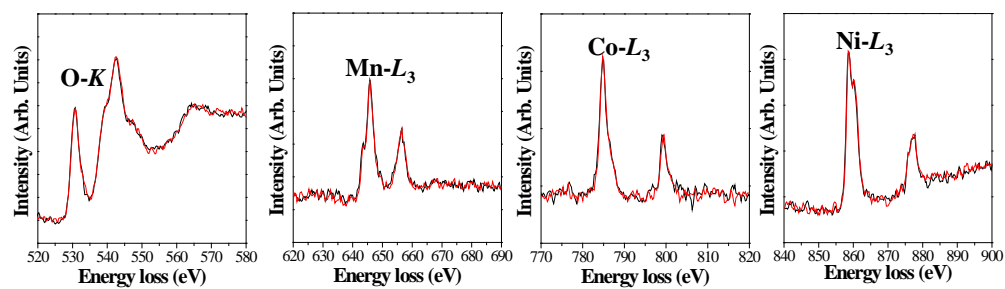

**(b) Charged at 4.3 V**

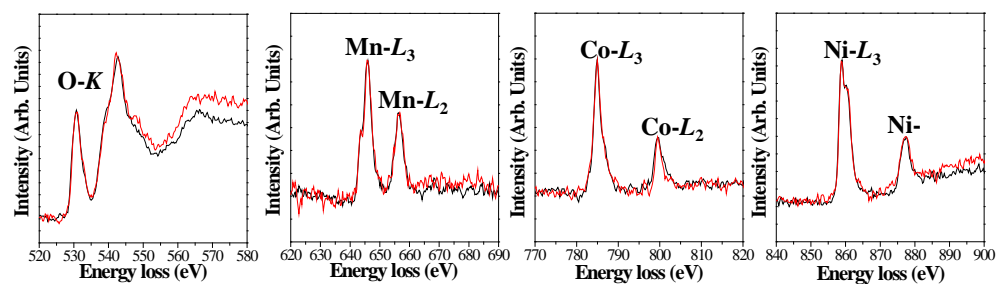

**(c) Charged at 4.5 V**

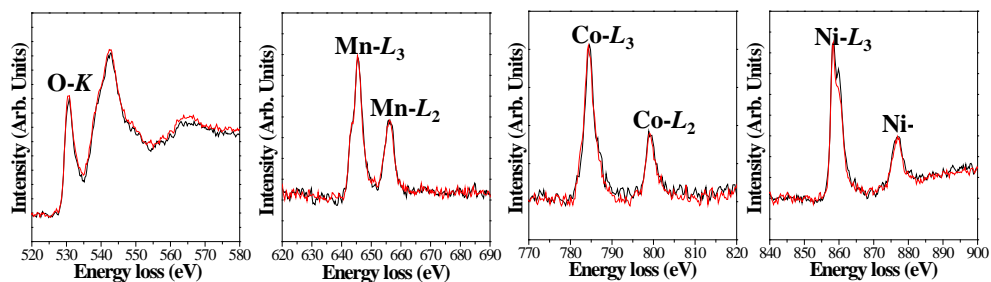

Figure 4S. EELS profiles of the O K and TM L edges obtained at an accelerating voltage of 80 kV of the pure  $\text{LiNi}_{0.6}\text{Co}_{0.2}\text{Mn}_{0.2}\text{O}_2$ ; (a) discharged and (b, c) charged states at 4.3 and 4.5 V, respectively. The black and red lines are the spectra obtained at initial (0 s) and final (600 s) stages of the electron beam irradiation, respectively.

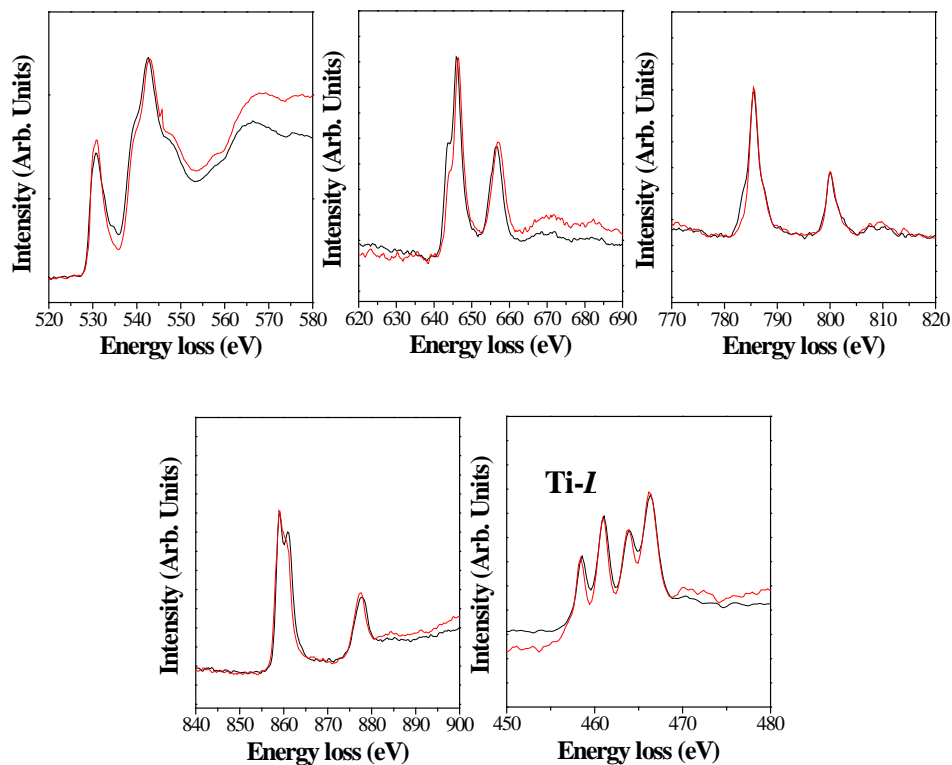

Figure 5S. EELS profiles of the O K and Ti L edges obtained at an accelerating voltage of 200 kV of the charged (at 4.3 V) Ti-doped  $\text{LiNi}_{0.6}\text{Co}_{0.2}\text{Mn}_{0.2}\text{O}_2$ . The black and red lines are the spectra obtained at the initial (0 s) and final (600 s) stages of the electron beam irradiation, respectively.
